# Supplementary material for: Endothelial cell signature in muscle stem cells validated by VEGFA-FLT1-AKT1 axis promoting survival of muscle stem cell
Source: eLife. 2024 Jun 6;13:e73592. doi: 10.7554/eLife.73592 (PMC11216748; doi:10.7554/eLife.73592)
Supplement: Figure 1—figure supplement 1—source data 1. [file elife-73592-fig1-figsupp1-data1.xlsx]

## Sheet: Sheet1
Source Data for Figure1 Supplement 1
Figure 1-Supp 1A	Average Signal Count									S.D.
GSE3483	Calcr	Cdh5	Kdr	Flt1	Nrp1	Nrp2	Vegfa	Pax7	Sdc4	Calcr	Cdh5	Kdr	Flt1	Nrp1	Nrp2	Vegfa	Pax7	Sdc4
QSC	896.575	151.775	355.625	156.825	555.95	144.675	250.5	3635.38	1310.5	255.416	48.1228	119.284	59.133	82.1655	50.5306	105.179	1425.09	504.381
ASC	9.35	15.15	63.95	7.925	306.475	175.875	311.25	510.65	145.975	2.16506	7.85859	24.8697	2.79624	121.868	74.656	129.627	216.457	54.9869
Figure 1-Supp 1B	Average FPKM								S.D.
GSE64379	Calcr	Cdh5	Kdr	Flt1	Pecam1	Nrp1	Nrp2	Vegfa	Calcr	Cdh5	Kdr	Flt1	Pecam1	Nrp1	Nrp2	Vegfa
QSC	55.0763	22.4638	6.35419	7.16574	24.6627	5.60671	34.0638	37.8939	13.3054	4.6431	1.82741	1.73903	4.91002	0.888065	6.74721	5.1493
ASC	0.736734	2.28829	0.417718	0.860876	1.64354	0.227825	8.42167	120.368	0.189845	1.32362	0.197272	0.66164	0.651968	0.0683365	1.03444	11.9378
Diff	0.501654	0.120167	0.0634415	0.00547435	0.152418	0.108521	16.8395	63.0049	0.572062	0.149303	0.0897198	0.0077419	0.145036	0.00320814	4.58658	3.06785
Figure 1-Supp 1C	Average FPKM								S.D.
GSE113631	Calcr	Cdh5	Kdr	Flt1	Pecam1	Nrp1	Nrp2	Vegfa	Calcr	Cdh5	Kdr	Flt1	Pecam1	Nrp1	Nrp2	Vegfa
QSC	70.1818	0.346	0.189929	0.2932	2.18835	2.84834	0.698607	8.26969	25.4902	0.262784	0.111414	0.130808	0.939247	0.930667	0.00512545	0.309468
Early ASC	48.6138	2.74342	2.21772	8.13048	26.7992	9.77675	3.36173	17.5415	4.47609	0.526399	0.814803	0.862667	7.10571	0.568409	0.138247	3.7595
Late ASC	0.615061	0.150639	0.00765625	0.0314945	1.10192	51.7261	6.26811	1.58715	0.066875	0.045017	0.00765625	0.0267703	0.0372191	2.59912	0.498507	0.156965
Figure 1-Supp 1D	Average FPKM											S.D.
GSE97399	Calcr	Cdh5	Kdr	Flt1	Pecam1	Nrp1	Nrp2	Vegfa	Sdc4	MyoD1	Pax7	Calcr	Cdh5	Kdr	Flt1	Pecam1	Nrp1	Nrp2	Vegfa	Sdc4	MyoD1	Pax7
QSC	11.4387	7.78284	4.09352	7.4447	12.1353	12.4124	1.6617	55.6195	117.815	11.5579	0.318128	0.229801	0.146734	0.123897	0.358675	0.254977	0.0340036	0.0430075	1.4291	4.79594	0.310622	0.029045
ASC	7.55252	5.05317	5.91366	2.46638	8.1808	5.50312	1.35923	35.9647	643.796	93.7366	17.8867	0.180454	0.210195	0.228396	0.0648675	0.152775	0.119371	0.0470335	0.656056	8.06899	5.64699	0.600165
Muscle	4.70486	4.23799	5.92417	2.59962	10.4955	12.5858	1.05687	18.3168	18.4173	28.5277	0.088917	0.136288	0.13047	0.139896	0.155736	0.163716	0.073623	0.018666	0.614515	0.205015	0.249425	0.00587526
Figure 1-Supp 1I	Average Population (%)		S.D.
	QSC	ASC	QSC	ASC
Basal	85.7333	13.5567	2.8614	0.585178
Injury	2.48667	94.4433	0.846778	0.582866
