# Supplementary material for: Endothelial cell signature in muscle stem cells validated by VEGFA-FLT1-AKT1 axis promoting survival of muscle stem cell
Source: eLife. 2024 Jun 6;13:e73592. doi: 10.7554/eLife.73592 (PMC11216748; doi:10.7554/eLife.73592)
Supplement: Figure 1—source data 1. [file elife-73592-fig1-data1.xlsx]

## Sheet: Sheet1
Source Data for Figure 1
Figure 1B		Average Expression (TPM)			S.D.
		SMF	MuSC	EC	SMF	MuSC	EC
MuSC genes	Calcr	0	20.607	0	0	4.1315	9.00688
	Myf5	0.275632	63.778	0.062228	0.0465201	18.7822	28.0882
	Myod1	3.54003	24.511	0	2.01477	2.55545	10.095
	Pax7	0.139539	84.8817	0	0.1282	21.3106	37.2337
EC genes	Kdr	0.103973	0.375028	142.983	0.0288536	0.156575	70.5609
	Cdh5	0.887174	1.99708	345.979	0.367099	0.974769	165.798
	Pecam1	1.63668	6.32321	320.422	0.926438	1.71785	160.456
	Jam2	0.409152	1.27818	85.2463	0.141729	0.223135	40.7952
	Adgrl4	0.234249	0.659347	199.609	0.0346973	0.139121	97.02
	Adgrf5	0.766672	1.63624	259.027	0.145542	0.732043	124.636
	Flt1	0.546009	1.03416	190.696	0.136211	0.0640816	91.4804
	Aqp1	3.22256	5.0868	565.981	0.108911	1.39754	272.326
	Fmo2	0.102982	0.615843	138.598	0.0419193	0.00283196	76.9906
	Gpihbp1	0.0234473	1.08746	155.464	0.040612	0.332429	74.7151
	Ecscr	0.191275	0.258788	90.7744	0.0343783	0.365982	44.1591
	Car4	0	0	68.708	0	0	33.3711
	Ctla2a	0.237846	0	78.0823	0.0509767	0	37.4592
	C1qtnf9	0.364352	1.27411	140.389	0.0455897	0.654152	68.4347
Muscle genes	Myh8	135.046	3.46758	0.0133657	41.5228	1.10651	65.2472
	Ryr1	109.709	1.43914	0.0761777	17.0504	0.736271	52.1684
	Myh2	140.962	1.59797	0.068665	16.1578	0.77079	67.0027
	Ttn	629.297	1.79556	0.264451	193.956	0.83322	306.659
MF genes	Ptprcap	0.0873557	0	0.205418	0.151304	0	0.179502
	Cd68	0.263964	2.71472	3.47516	0.259423	1.43359	1.80349
	Adgre1	0	0	0.100685	0	0	0.0860709
	Itgam	0.038425	1.73629	0.950097	0.0401992	2.0046	1.05454
Figure 1G	Average Fold Change				S.D.
	Kdr	Flt1	Nrp1	Nrp2	Kdr	Flt1	Nrp1	Nrp2
B.end3	1	1	1	1	0	0	0	0
C166	0.0170667	0.6007	0.9058	1.33097	0.00655752	0.220354	0.316014	0.68273
C2C12	0.00215	0.935033	0.0308667	0.0004	0.00175547	0.889086	0.0229951	0.000163299
Myoblast	0.0028	0.0163	0.418233	0.283467	0.00200083	0.00783837	0.105247	0.0527345
DM day 1	0.0048	0.2644	0.31945	0.1277	0.00260064	0.101263	0.14603	0.0792768
DM day 2	0.00436667	0.3398	0.456367	0.3124	0.00127323	0.0769176	0.0436685	0.0233932
DM day 3	0.0049	0.2551	0.4244	0.2478	0.00269444	0.139784	0.132272	0.0164116
