# Supplementary material for: Endothelial cell signature in muscle stem cells validated by VEGFA-FLT1-AKT1 axis promoting survival of muscle stem cell
Source: eLife. 2024 Jun 6;13:e73592. doi: 10.7554/eLife.73592 (PMC11216748; doi:10.7554/eLife.73592)
Supplement: Figure 2—figure supplement 1—source data 1. [file elife-73592-fig2-figsupp1-data1.xlsx]

## Sheet: Sheet1
Source Data for Figure 2 Supplement 1
Figure 1-Supp 1C	Average Fusion Index (%)	S.D.
Control	51.1918	8.05604
bFGF	9.19783	2.321
VEGFA	59.5989	4.93066
Figure 2-Supp 1D	VEGFA (ng/ml)
	0	2	10	50
Relative MyH3 Expression	1	1.05108	1.00374	1.04624
S.D.	0	0.0167915	0.0616635	0.0240866
Figure 2-Supp 1F	UV + VEGFA (ng/ml)
	0	5	20	50
Average Cell Survive	19.9167	61.6667	96.4167	71.2222
S.D.	3.96629	11.2891	14.9923	6.67777
Figure 2-Supp 1H	Average Population (%)				S.D.
	0hr	15hr	24hr	40hr	0hr	15hr	24hr	40hr
Live	91.91	82.24	46.49	11.2	1.79208	0.659102	4.42244	6.93857
Apoptotic	4.57392	10.4521	33.7804	59.8928	1.84569	1.07425	2.39522	8.26665
Necrotic	2.57595	4.51504	13.0845	16.9157	1.64083	1.00277	3.88894	0.335818
Figure 2-Supp 1I	Average Fold Change		S.D.
	MuSC-Flt1+/+	MuSC-Flt1Δ/Δ	MuSC-Flt1+/+	MuSC-Flt1Δ/Δ
Exon 1-2	1	0.601554	0.126093	0.0895479
Exon 2-3	1	0.1033	0.249661	0.0153078
Figure 2-Supp 1K	MuSC-Flt1+/+	MuSC-Flt1Δ/Δ
Average EdU(+) Cells	23.4863	22.3782
S.D.	2.88842	1.80651
Figure 2-Supp 1L	MuSC-Flt1+/+	MuSC-Flt1Δ/Δ
Average MyHC(+) Cells	87.6434	85.1902
S.D.	1.36495	2.19414
Figure 2-Supp 1O	MuSC-Flt1+/+ (Control)	MuSC-Flt1Δ/Δ (VEGFA)	MuSC-Flt1+/+ (Control)	MuSC-Flt1Δ/Δ (VEGFA)
Average relative pAKT	1	1.06632	0.628622	0.738205
S.D.	0.0697225	0.0988972	0.0547982	0.0507786
