# Supplementary material for: Endothelial cell signature in muscle stem cells validated by VEGFA-FLT1-AKT1 axis promoting survival of muscle stem cell
Source: eLife. 2024 Jun 6;13:e73592. doi: 10.7554/eLife.73592 (PMC11216748; doi:10.7554/eLife.73592)
Supplement: Figure 2—source data 1. [file elife-73592-fig2-data1.xlsx]

## Sheet: Sheet1
Source Data for Figure 2
Figure 2B	Average Polulation (%)				S.D
	Control	VEGFA(50ng/ml)	Flt1-FC(100ng/ml)	VEGFA+Flt-1FC	Control	VEGFA(50ng/ml)	Flt1-FC(100ng/ml)	VEGFA+Flt1-FC
Live Cell	71.403	82.0785	53.455	58.951	3.23164	5.07963	7.38821	6.01989
PI only	3.0344	2.18015	3.11365	2.77414	1.25191	0.519814	1.42241	0.803186
Apoptotic	17.3602	11.6407	29.4009	26.4921	1.10053	3.07772	5.30242	2.99833
Necrotic	8.20237	4.10073	14.0305	11.7827	1.73597	1.63289	4.11824	3.45469
Figure 2D	Average Polulation (%)				S.D.
	Viable	Necrotic	Early Apoptotic	Late Apoptotic	Viable	Necrotic	Early Apoptotic	Late Apoptotic
Control	55.1667	1.1	14.2333	29.5333	7.51095	0.11547	2.3877	5.3648
Control+VEGFA	54	1.6	15.7667	28.6333	2.08087	0.305505	2.0177	0.384419
Flt1-FC	38.8	1.43333	13.3667	46.4333	11.7286	0.409607	0.145297	11.1738
anti-Flt1 mAb	18.4333	2.06667	10.5	69.0333	12.0933	1.0651	3.22542	15.1026
ZM306416	52.2333	3.43333	17.4333	26.9333	2.20404	0.731057	1.33208	1.69148
SU5402	55.8667	2.53333	17.1667	24.4333	1.65965	0.895048	4.66667	5.79492
EG00229	55.0667	1.46667	12.9	30.6	1.88001	0.145297	0.2	2.16564
Figure 2E	Average Polulation (%)				S.D.
	Viable	Necrotic	Early Apoptotic	Late Apoptotic	Viable	Necrotic	Early Apoptotic	Late Apoptotic
Flt-1flox/flox:Pax7+/+	94.9667	0.2	3.6	1.23333	3.47035	0.1	2.55147	1.02144
Flt-1flox/flox:Pax7+/+ + 4-OHT	90.9	0.366667	4.7	4.03333	5.84123	0.208167	3.60416	4.99433
Flt-1flox/flox:Pax7CreERT2/+	87.5333	0.366667	5.43333	6.66667	3.23161	0.305505	2.21209	4.7606
Flt-1flox/flox:Pax7CreERT2/+ + 4-OHT	70.8667	0.433333	12.7667	15.9333	7.96639	0.416333	3.99291	4.06243
Figure 2F	Average Polulation (%)				S.D.
	Control	VEGFA	4-OHT	4-OHT + VEGFA	Control	VEGFA	4-OHT	4-OHT + VEGFA
Live Cell	71.403	82.0785	53.455	58.951	3.38197	5.07963	7.38821	6.0253
PI only	3.0344	2.18015	3.11365	2.77414	1.04929	0.519814	1.42241	0.921021
Apoptotic	17.3602	11.6407	29.4009	26.4921	1.66693	3.07772	5.30242	3.45679
Necrotic	8.20237	4.10073	14.0305	11.7827	1.70548	1.63289	4.11824	2.42901
Figure 2H	Average pAKT(+) Cells (%)				S.D.
	Control	VEGFA	4-OHT	4-OHT + VEGFA	Control	VEGFA	4-OHT	4-OHT + VEGFA
	59.7514	95.0081	59.7514	59.7514	17.5583	2.08638	7.41599	5.35587
Figure 2I	Average Polulation (%)			S.D.
	Control	Myr-AKT	E4ORF1	Control	Myr-AKT	E4ORF1
Live Cell	60.8067	80.9644	86.58	6.5863	1.96862	2.30719
PI only	1.8169	2.54611	2.03191	0.758541	0.852589	0.636616
Apoptotic	25.7955	11.7774	7.9238	3.80859	1.82882	1.68463
Necrotic	11.5809	4.71202	3.46429	3.09488	0.912754	0.831098
