# Supplementary material for: Endothelial cell signature in muscle stem cells validated by VEGFA-FLT1-AKT1 axis promoting survival of muscle stem cell
Source: eLife. 2024 Jun 6;13:e73592. doi: 10.7554/eLife.73592 (PMC11216748; doi:10.7554/eLife.73592)
Supplement: Figure 3—figure supplement 2—source data 1. [file elife-73592-fig3-figsupp2-data1.xlsx]

## Sheet: Sheet1
Source Data for Figure 3 Supplement 2
Figure 3-Supp 2C	Relative Frequency (%)			Figure 3-Supp 2G	Relative Frequency (%)			Figure 3-Supp 2I	Relative Frequency (%)
Feret's Diamerer (mm)	MuSC-VEGFA+/+	MuSC-VEGFAΔ/Δ		Feret's Diamerer (mm)	MuSC-Flt1+/+	MuSC-Flt1Δ/Δ		Feret's Diamerer (mm)	MuSC-Flt1+/+	MuSC-Flt1Δ/Δ
0	0	0		5	0.178435	0.495186		10	0	0.260078
5	0	0		10	2.67652	5.19945		15	0	0.130039
10	0	0		15	9.5845	15.3508		20	0.066357	0.455137
15	0.0497141	0.243638		20	13.8924	18.3769		25	0.729927	1.88557
20	1.044	2.9778		25	16.1356	16.8638		30	3.98142	6.63199
25	5.41884	10.9908		30	17.3592	13.3975		35	10.8162	10.5982
30	14.4917	24.2285		35	14.9885	11.1967		40	17.85	16.0598
35	22.1974	24.039		40	11.2414	8.08803		45	20.438	18.2705
40	23.6639	16.0801		45	6.5766	4.86933		50	18.9117	16.71
45	18.1457	10.2599		50	4.23146	2.88858		55	17.9827	11.9636
50	9.56997	5.63075		55	1.75886	1.51307		60	7.29927	7.21717
55	3.55456	3.05901		60	0.994137	0.88033		65	1.72528	4.22627
60	1.54114	1.81375		65	0.229416	0.522696		70	0.132714	2.79584
65	0.248571	0.568489		70	0.127453	0.165062
70	0.0745712	0.108284
Figure 3-Supp 2D	BaCl2 28d			Figure 3-Supp 2H	BaCl2 7d			Figure 3-Supp 2J	BaCl2 28d
	MuSC-VEGFA+/+	MuSC-VEGFAΔ/Δ			MuSC-Flt1+/+	MuSC-Flt1Δ/Δ			MuSC-Flt1+/+	MuSC-Flt1Δ/Δ
Feret's Diamerer (mm)	39.2416	36.2862		Feret's Diamerer (mm)	30.2744	28.2337		Feret's Diamerer (mm)	42.3187	39.4209
S.D.	0.458056	0.933923		S.D.	0.557145	1.34615		S.D.	2.24293	2.02097
Figure 3-Supp 2E	BaCl2 28d
	MuSC-VEGFA+/+	MuSC-VEGFAΔ/Δ
Average Oil red-O Area (%)	0.486986	3.32426
S.D.	0.210121	0.613513
