# Supplementary material for: Endothelial cell signature in muscle stem cells validated by VEGFA-FLT1-AKT1 axis promoting survival of muscle stem cell
Source: eLife. 2024 Jun 6;13:e73592. doi: 10.7554/eLife.73592 (PMC11216748; doi:10.7554/eLife.73592)
Supplement: Figure 3—source data 1. [file elife-73592-fig3-data1.xlsx]

## Sheet: Sheet1
Source Data for Figure 3
Figure 3C	Average Polulation (%)		S.D.			Figure 3G	Average Polulation (%)		S.D.			Figure 3K	Average Polulation (%)		S.D.
	Control	VEGFA+/Hyper	Control	VEGFA+/Hyper			MuSC-VEGFA+/+	MuSC-VEGFAΔ/Δ	MuSC-VEGFA+/+	MuSC-VEGFAΔ/Δ			MuSC-Flt1+/+	MuSC-Flt1Δ/Δ	MuSC-Flt1+/+	MuSC-Flt1Δ/Δ
Live Cell	84.5333	87.9667	2.93995	2.74651		Live Cell	90.925	86.3	5.9902	3.33766		Live Cell	94.2525	84.3225	4.89562	4.70472
PI only	1.79333	2.00667	0.745676	2.28933		Dead	6.575	13.65	1.43149	3.41809		Dead Cell	5.9875	15.81	4.54743	4.46906
Apoptotic	3.34333	3.53667	1.03751	0.37581
Necrotic	10.3433	6.48333	1.88564	0.407962
Figure 3D	Average MuSC/Fiber		S.D.			Figure 3H	Average MuSC/Fiber		S.D.			Figure 3L	Average MuSC/Fiber		S.D.
	VEGFA+/+	VEGFA+/Hyper	VEGFA+/+	VEGFA+/Hyper			MuSC-VEGFA+/+	MuSC-VEGFAΔ/Δ	MuSC-VEGFA+/+	MuSC-VEGFAΔ/Δ			MuSC-Flt1+/+	MuSC-Flt1Δ/Δ	MuSC-Flt1+/+	MuSC-Flt1Δ/Δ
Baseline	4.86271	5.77693	0.613072	0.366128		Baseline	5	4.86667	1.1447	1.13664		Live Cell	5.464	5.52583	0.869829	0.746482
Post-injury	18.2336	24.2658	2.00962	1.80794		Post-injury	22.2	13.9333	4.45204	3.95608		Dead Cell	21.547	14.8384	3.8305	2.19756
Figure 3E	Relative Frequency (%)					Figure 3I	Relative Frequency (%)					Figure 3M	Relative Frequency (%)
Feret's Diamerer (mm)	VEGFA+/+	VEGFA+/Hyper	BaCl2 14d VEGFA+/+	BaCl2 14d VEGFA+/Hyper		Feret's Diamerer (mm)	MuSC-VEGFA+/+	MuSC-VEGFAΔ/Δ	BaCl2 14d MuSC-VEGFA+/+	BaCl2 14d MuSC-VEGFAΔ/Δ		Feret's Diamerer (mm)	MuSC-Flt1+/+	MuSC-Flt1Δ/Δ	BaCl2 14d MuSC-Flt1+/+	BaCl2 14d MuSC-Flt1Δ/Δ
0	0	0	0	0.0425985		0	0	0	0	0.0425985		0	0	0	0	0
4	0	0	0	0		4	0	0	0	0		4	0	0	0	0.108932
8	0	0.0510725	0.868403	0.212993		8	0	0.0510725	0.868403	0.212993		8	0.0462214	0.157563	0.633943	1.04575
12	0.0469043	0.0510725	4.30862	0.724175		12	0.0469043	0.0510725	4.30862	0.724175		12	0.161775	0.157563	2.8618	3.28976
16	0.633208	0.510725	8.61723	3.47178		16	0.633208	0.510725	8.61723	3.47178		16	0.878207	0.892857	5.97718	8.84532
20	2.81426	2.65577	12.4582	7.90202		20	2.81426	2.65577	12.4582	7.90202		20	2.12618	2.73109	9.30991	13.3115
24	5.4878	5.46476	18.8377	13.2268		24	5.4878	5.46476	18.8377	13.2268		24	5.26924	4.67437	13.2041	16.5577
28	8.88837	12.5638	18.1029	14.3983		28	8.88837	12.5638	18.1029	14.3983		28	7.23365	6.77521	13.5664	13.0501
32	10.9991	11.6956	12.5585	15.5485		32	10.9991	11.6956	12.5585	15.5485		32	10.0532	9.84769	13.4034	11.329
36	15.0797	13.2278	9.08484	14.8669		36	15.0797	13.2278	9.08484	14.8669		36	13.2655	10.3466	11.248	10.2179
40	16.6276	13.5342	7.21443	11.5229		40	16.6276	13.5342	7.21443	11.5229		40	13.3349	12.2899	10.6321	7.82135
44	14.4231	13.0746	4.17502	7.51864		44	14.4231	13.0746	4.17502	7.51864		44	13.358	12.7101	7.26318	5.25054
48	9.56848	11.1338	2.20441	5.00532		48	9.56848	11.1338	2.20441	5.00532		48	11.3474	10.688	4.32893	4.09586
52	6.49625	6.89479	0.701403	2.66241		52	6.49625	6.89479	0.701403	2.66241		52	8.13497	9.55882	2.68067	2.37473
56	4.62008	4.69867	0.601202	1.34185		56	4.62008	4.69867	0.601202	1.34185		56	5.63901	6.82773	2.31842	1.2854
60	2.53283	2.75792	0.133601	0.830671		60	2.53283	2.75792	0.133601	0.830671		60	3.58216	5.2521	1.286	0.740741
64	1.10225	1.17467	0.1002	0.383387		64	1.10225	1.17467	0.1002	0.383387		64	1.61775	3.15126	0.724506	0.239651
68	0.492495	0.40858	0	0.170394		68	0.492495	0.40858	0	0.170394		68	1.98752	2.15336	0.344141	0.348584
Figure 3F	Intact		BaCl2 14d			Figure 3J	Intact		BaCl2 14d			Figure 3N	Intact		BaCl2 14d
	VEGFA+/+	VEGFA+/Hyper	VEGFA+/+	VEGFA+/Hyper			MuSC-VEGFA+/+	MuSC-VEGFAΔ/Δ	MuSC-VEGFA+/+	MuSC-VEGFAΔ/Δ			MuSC-Flt1+/+	MuSC-Flt1Δ/Δ	MuSC-Flt1+/+	MuSC-Flt1Δ/Δ
Feret's Diamerer (mm)	39.216	40.2088	27.8146	33.2142		Feret's Diamerer (mm)	36.66	35.629	32.2318	27.061		Feret's Diamerer (mm)	41.3152	41.8645	32.293	29.9429
S.D.	2.16392	4.53138	2.17901	1.72857		S.D.	1.01528	2.52289	0.398244	2.93718		S.D.	1.327	2.32765	1.00695	1.2243
