# Supplementary material for: Endothelial cell signature in muscle stem cells validated by VEGFA-FLT1-AKT1 axis promoting survival of muscle stem cell
Source: eLife. 2024 Jun 6;13:e73592. doi: 10.7554/eLife.73592 (PMC11216748; doi:10.7554/eLife.73592)
Supplement: Figure 4—figure supplement 1—source data 1. [file elife-73592-fig4-figsupp1-data1.xlsx]

## Sheet: Sheet1
Source Data for Figure 4 Supplement 1
Figure 4-Supp 1A	Relative Gene Expression
	Mouse MuSC				Animal Muscle			Human Muscle
	QSC	mdx	Prenatal	Culture	Normal	GRMD	mdx	Exercise	Normal	Early DMD	Late DMD	BMD	FSHD	ALS
Vegfa	1	0.545904	0.786981	2.12089	1	0.629143	0.719262	1.42444	1	0.732295	0.639759	0.732307	1.02517	0.713794
Vegfb	1	2.2987	2.2559	1.3617	1	0.703233	0.682599	1.17144	1	0.958001	1.113	0.974612	1.26984	0.798166
Vegfc	1	0.810627	0.243049	1.25561	1	0.902066	0.637143	1.07809	1	1.06505	1.17224	1.01706	1.17122	0.940285
Kdr	1	0.202934	0.120133	0.0412535	1	0.537123	1.02322	0.898319	1	1.00661	1.17067	1.09449	1.08304	0.984314
Flt1	1	0.230273	0.125377	0.118478	1	0.517	0.934923	0.875683	1	0.962728	1.01035	0.991662	0.986041	0.93313
Nrp1	1	0.564674	0.190274	0.342216	1	0.692555	1.13909	0.985105	1	1.05023	0.959364	0.999459	0.858191	0.780278
Nrp2	1	0.748451	0.495398	1.27634	1	1.55123	0.977061	1.16339	1	0.932592	0.926916	1.01999	0.93165	0.872399
Figure 4-Supp 1B	Average Body Weight (g)		S.D.
	mdx:MuSC-Flt1+/+	mdx:MuSC-Flt1Δ/Δ	mdx:MuSC-Flt1+/+	mdx:MuSC-Flt1Δ/Δ
3 Months	29.52	30.025	2.42425	1.47281
12 Months	37.7444	39.5818	4.32843	4.39276
Figure 4-Supp 1C	Relative Frequency (%)			Figure 4-Supp 1D	mdx:MuSC-Flt1+/+	mdx:MuSC-Flt1Δ/Δ	mdx:VEGFA+/+	mdx:VEGFA+/Hyper
Feret's Diamerer (mm)	mdx:MuSC-Flt1+/+	mdx:MuSC-Flt1Δ/Δ		Average Relative Capillarly Density	278.675	236.702	255.493	296.627
0	0	0
5	0	0		S.D.	24.1565	31.4226	22.0732	15.1758
10	0.183089	0.376461
15	1.43142	2.81355		Figure 4-Supp 1E	mdx:VEGFA+/+	mdx:VEGFA+/Hyper
20	5.2763	7.9255		Average Body Weight (g)	39.0333	35.9167
25	10.0033	13.6913		S.D.	3.3137	4.35036
30	14.0479	16.7822
35	15.2297	15.1971
40	14.1644	12.2251
45	12.6165	10.3428
50	9.53728	6.67723
55	6.24168	4.59679
60	4.11119	3.58629
65	3.07923	2.27858
70	2.06391	1.68417
Figure 4-Supp 1F	Relative Frequency (%)
Feret's Diamerer (mm)	mdx:VEGFA+/+ TA	mdx:VEGFA+/Hyper TA	mdx:VEGFA+/+DM	mdx:VEGFA+/HyperDM
0	0	0	0.0256608	0
4	0.0230627	0	0.33359	0.0731707
8	0.415129	0.121065	2.54042	1.02439
12	2.95203	0.823245	10.213	5.90244
16	4.31273	2.37288	17.7059	15.0976
20	7.03413	4.98789	22.0426	21.439
24	10.3321	7.23971	18.4501	20.5366
28	11.6697	10.6295	12.856	14.6098
32	12.5461	11.7918	7.87785	10.122
36	11.1393	12.9298	4.23403	5.56098
40	10.1015	11.5981	1.74493	2.70732
44	8.30258	9.78208	1.05209	1.58537
48	6.18081	6.97337	0.461894	0.756098
52	4.28967	5.98063	0.282268	0.317073
56	3.09041	4.64891	0.102643	0.170732
60	2.3524	3.12349	0.0513215	0.097561
64	1.52214	2.42131	0	0
68	1.13007	1.40436	0	0
