# Supplementary material for: Endothelial cell signature in muscle stem cells validated by VEGFA-FLT1-AKT1 axis promoting survival of muscle stem cell
Source: eLife. 2024 Jun 6;13:e73592. doi: 10.7554/eLife.73592 (PMC11216748; doi:10.7554/eLife.73592)
Supplement: Figure 4—figure supplement 2—source data 1. [file elife-73592-fig4-figsupp2-data1.xlsx]

## Sheet: Sheet1
Source Data for Figure 4 Supplement 2
Figure 4-Supp 2C	mdx:VEGFA+/+	mdx:VEGFA+/Hyper
Relative Cas-3 Positive	43.25	28.25
S.D.	7.58837	7.27438
