# Supplementary material for: Endothelial cell signature in muscle stem cells validated by VEGFA-FLT1-AKT1 axis promoting survival of muscle stem cell
Source: eLife. 2024 Jun 6;13:e73592. doi: 10.7554/eLife.73592 (PMC11216748; doi:10.7554/eLife.73592)
Supplement: Figure 4—source data 1. [file elife-73592-fig4-data1.xlsx]

## Sheet: Sheet1
Source Data for Figure 4
Figure 4C	mdx:MuSC-Flt1+/+	mdx:MuSC-Flt1Δ/Δ
Average Feret's Diameter (mm)	39.1883	35.5217
S.D.	3.17449	2.22997
Figure 4D	mdx:MuSC-Flt1+/+	mdx:MuSC-Flt1Δ/Δ
Average Fibrosis (%)	6.73368	9.0028
S.D.	0.598884	1.84639
Figure 4E	mdx:MuSC-Flt1+/+	mdx:MuSC-Flt1Δ/Δ
Average Laser Doppler Flux (AU)	143.9	102.833
S.D.	38.5298	30.5414
Figure 4F	Average Feret's Diameter (mm)		S.D.
	mdx:MuSC-Flt1+/+	mdx:MuSC-Flt1Δ/Δ	mdx:MuSC-Flt1+/+	mdx:MuSC-Flt1Δ/Δ
3 months	40.2507	35.0317	2.40909	2.79885
12 months	33.3331	29.8469	3.69813	4.3845
Figure 4H	mdx:VEGFA+/+ TA	mdx:VEGFA+/Hyper TA	mdx:VEGFA+/+ DM	mdx:VEGFA+/Hyper DM
Average Feret's Diameter (mm)	35.9403	39.5584	22.171	24.0402
S.D.	1.52216	0.620604	0.466278	1.10331
Figure 4I	mdx:VEGFA+/+ TA	mdx:VEGFA+/Hyper TA	mdx:VEGFA+/+ DM	mdx:VEGFA+/Hyper DM
Average Fibrosis (%)	22.7987	15.7524	59.8659	44.2344
S.D.	3.90126	3.15262	6.35908	5.46551
Figure 4J	mdx:VEGFA+/+	mdx:VEGFA+/Hyper
Average Laser Doppler Flux (AU)	129.514	157.214
S.D.	27.1285	28.3276
Figure 4K	mdx:VEGFA+/+	mdx:VEGFA+/Hyper
Average Grip Strength (N/kg)	35.6171	41.3724
S.D.	4.925	4.53908
