# Supplementary material for: Endothelial cell signature in muscle stem cells validated by VEGFA-FLT1-AKT1 axis promoting survival of muscle stem cell
Source: eLife journal article supplement (doi:10.7554/elife.73592), 2024-06-06

Figure 2-figure supplement 1N source data

Uncropped blotting image

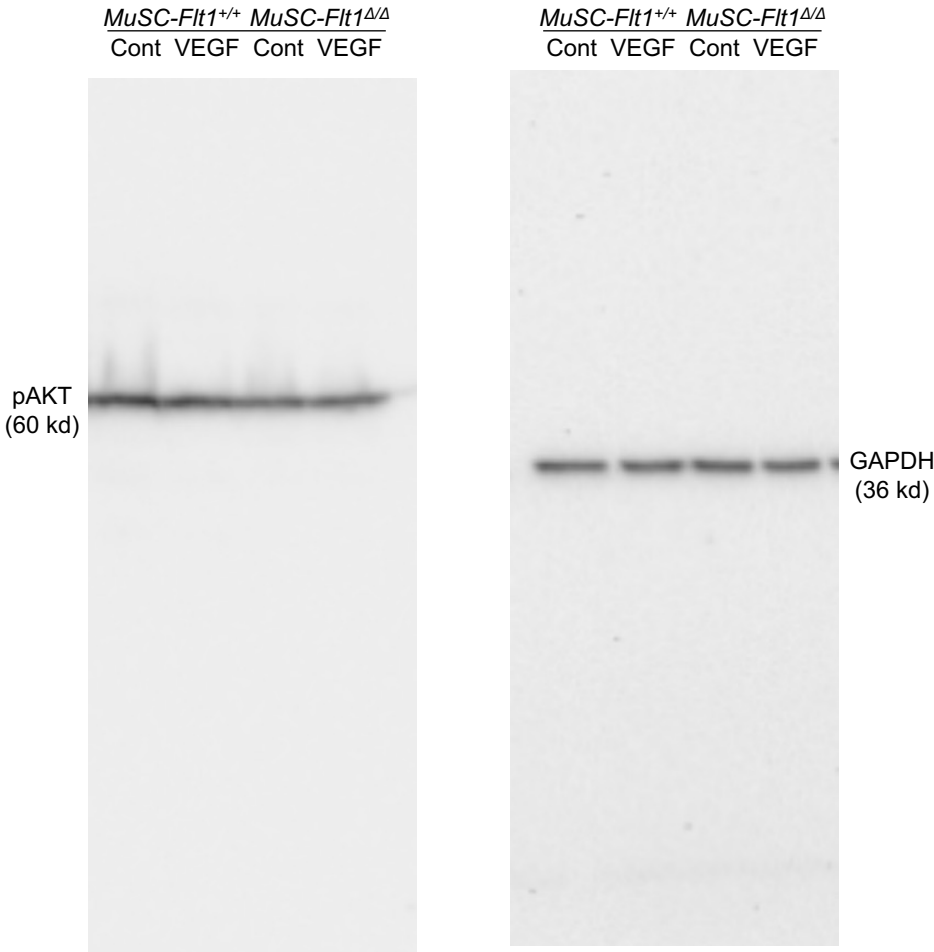

Supplement: supp [file elife-73592-supp-v1.zip]
