# Supplementary material for: Endothelial cell signature in muscle stem cells validated by VEGFA-FLT1-AKT1 axis promoting survival of muscle stem cell
Source: eLife journal article supplement (doi:10.7554/elife.73592), 2024-06-06
Supplement: supp [file elife_poa_e73592_Figure_3_figure_supplement_1_source_data_1.xlsx]

## Sheet: Sheet1
Source Data for Figure 3 Supplement 1
Figure 3-Supp 1A	Average Fold Change				S.D.
	Vegfa	Kdr	sFlt1	mFlt1	Vegfa	Kdr	sFlt1	mFlt1
WT	1.22	0.91	0.95	1.18	0.292503	0.379367	0.192058	0.374039
VEGFAHyper	2.72	0.78	1.43	1.32	0.877874	0.659583	0.4573	0.603743
Figure 3-Supp 1C	Relative Frequency (%)			Figure 3-Supp 1D	CTX 28d
Feret's Diamerer (mm)	VEGFA+/+	VEGFA+/Hyper			VEGFA+/+	VEGFA+/Hyper
0	0	0		Feret's Diamerer (mm)	34.7512	36.8496
5	0	0		S.D.	1.63124	0.657778
10	0.0158755	0
15	0.269884	0.196133
20	2.49246	1.54105
25	8.54104	5.04343
30	17.4155	11.8521
35	20.4001	16.8395
40	18.0346	21.1824
45	13.4783	17.5679
50	9.5412	12.5525
55	5.68344	7.87335
60	2.54009	3.05408
65	1.11129	1.37293
70	0.301635	0.392267
Figure 3-Supp 1F	MuSC-VEGFA+/+	MuSC-VEGFAΔ/Δ	MuSC-Flt1+/+	MuSC-Flt1Δ/Δ	VEGFA+/+	VEGFA+/+Hyper
Average eMyHC(+) Feret's diameter (mm)	21.121	18.3604	23.1786	20.7792	19.9252	24.0399
S.D.	8.86473	8.34136	7.01236	7.63995	6.91011	8.21088
