# Supplementary material for: Endothelial cell signature in muscle stem cells validated by VEGFA-FLT1-AKT1 axis promoting survival of muscle stem cell
Source: eLife journal article supplement (doi:10.7554/elife.73592), 2024-06-06
Supplement: supp [file elife_poa_e73592_Source_code_1.xls]

## Sheet: Key resources
Key Resources Table
Reagent type (species) or resource	Designation	Source or reference	Identifiers	Additional information
Strain (Mus musculus)	Flt1LoxP/LoxP	The Jackson Laboratory	JAX: 028098	Mouse line obtained from Guo-Hua Fong
Strain (Mus musculus)	VEGFA+/Hyper	The Jackson Laboratory	JAX: 027314
Strain (Mus musculus)	Pax7CreERT2/+	The Jackson Laboratory	JAX: 017763
Strain (Mus musculus)	mdx5cv	The Jackson Laboratory	JAX: 002379
Strain (Mus musculus)	Flk1GFP	The Jackson Laboratory	JAX: 017006	Mouse line obtained from Masatsugu Ema
Strain (Mus musculus)	R26RtdT	The Jackson Laboratory	JAX: 007909
Strain (Mus musculus)	VEGFALoxP/LoxP			Mouse line obtained from Napoleone Ferrara
Genetic reagent	Lentiviral pCCL-E4ORF1	PMID: 20972423		Viral vector production
Genetic reagent	Lentiviral pCCL-myrAkt1	PMID: 20972423		Viral vector production
Genetic reagent	pCMV-VSV-G	Addgene	8454	Viral vector production
Genetic reagent	pRSV-Rev	Addgene	12253	Viral vector production
Genetic reagent	pMDLg/pRRE	Addgene	12251	Viral vector production
Genetic reagent	RNAscope Probe - Mm-Flt1 (C1)	ACDBio	415541	RNAscope
Cell line (Homo sapiens)	293FT	ThermoFisher Scoentific	R70007	Viral vector production
Cell line (Mus musculus)	C2C12	American Type Culture Collection (ATCC)	CRL-1772	MuSC line
Cell line (Mus musculus)	b.End.3	American Type Culture Collection (ATCC)	CRL-2299	EC line
Cell line (Mus musculus)	C166	American Type Culture Collection (ATCC)	CRL-2581	EC line
Antibody	Anti-CD31-PE (Rat monoclonal)	ThermoFisher Scientific	12-0311-82; RRID: AB_465632	1:200
Antibody	Anti-CD45-PE (Rat monoclonal)	ThermoFisher Scientific	12-0451-81; RRID: AB_465668	1:200
Antibody	Anti-Sca-1-PE (Rat monoclonal)	ThermoFisher Scientific	A18486; RRID: AB_2535332	1:200
Antibody	Anti-FLT1 (Mouse monoclonal)	R&D systems	MAB4711; RRID: AB_2107038	1:200
Antibody	Anti-FLT1-APC (Rat monoclonal)	R&D systems	FAB4711A; RRID: AB_622149	1:200
Antibody	Anti-FLK1 (Rat monoclonal)	BD Biosceinces	555307; RRID: AB_395720	1:200
Antibody	Anti-FLK1-APC (Rat monoclonal)	BD Biosceinces	560070; RRID: C28AB_1645226	1:200
Antibody	Anti-VE-cadherin (Rat monoclonal)	BD Biosciences	555289; RRID: AB_2244723	1:200
Antibody	Anti-NRP1 (Rabbit monoclonal)	Cell Signaling Technology	3725; RRID:AB_2155231	1:200
Antibody	Anti-NRP1-APC (Rat monoclonal)	R&D systems	FAB5994A	1:200
Antibody	Anti-NRP2 (Rabbit monoclonal)	Cell Signaling Technology	3366; RRID: AB_2155250	1:200
Antibody	Anti-NRP2-APC (Mouse monoclonal)	R&D systems	FAB22151A; RRID: AB_10973479	1:200
Antibody	Anti-Sca-1-PE (Rat monoclonal)	eBiosciences	12-5981-81; RRID: AB_466085	1:200
Antibody	Anti-integrin a7-biotin (Mouse monoclonal)	Miltenyi Biotec	130-101-979; RRID: AB_2652472	1:200
Antibody	Anti-IgG-APC (Mouse)	ThermoFisher Scientific	PA5-33237; RRID: AB_2550652	1:200
Antibody	Anti-IgG-APC (Rat)	ThermoFisher Scientific	17-4321-81; RRID: AB_470181	1:200
Antibody	Anti-MyHC (Mouse monoclonal)	Developmental Study Hybridoma Bank	MF-20; RRID: AB_2147781	1:50
Antibody	Anti-MyoD (Mouse monoclonal)	DAKO	M3512; RRID: AB_2148874	1:200
Antibody	Anti-Pax7 (Mouse monoclonal)	Developmental Study Hybridoma Bank	PAX7; RRID: AB_528428	1:20
Antibody	Anti-pAKT (Rabbit monoclonal)	Cell Signaling	4060; RRID: AB_2315049	1:500
Antibody	Anti-VEGFA (Rabbit monoclonal)	Abcam	Ab52917; RRID: AB_883427	1:500
Antibody	Anti-mouse IgG Alexa488	ThermoFisher Scientific	A-11001; RRID: AB_2534069	1:1000
Antibody	Anti-rat IgG Alexa488	ThermoFisher Scientific	A-11006; RRID: AB_141373	1:1000
Antibody	Anti-rabbit IgG Alexa488	ThermoFisher Scientific	A-11008; RRID: AB_143165	1:1000
Antibody	Anti-rabbit IgG Alexa568	ThermoFisher Scientific	A-11011; RRID: AB_143157	1:1000
Antibody	Anti-mouse IgG Alexa568	ThermoFisher Scientific	A-11004; RRID: AB_2534072	1:1000
Antibody	Anti-rat IgG Alexa568	ThermoFisher Scientific	A-11077; RRID: AB_2534121	1:1000
Antibody	Anti-biotin beads	Miltenyi Biotec	130-090-485; RRID: AB_244365	MACS (1:500)
Antibody	Anti-PE beads	Miltenyi Biotec	130-048-801; RRID: AB_244373	MACS (1:500)
Antibody	Anti-Activated Caspase-3	Abcam	ab214430; RRID: AB_2938798	1:200
Antibody	Anti-phosphoAKT1	Cell Signaling	4060; RRID: AB_2315049	1:200 for IHC, 1:1000 for WB
Antibody	Anti-GAPDH HRP conjugated	Cell Signaling	3683; RRID: AB_1642205	1:10000
Antibody	Anti-eMHC (Mouse monoclonal)	Developmental Study Hybridoma Bank	F1.652; RRID: AB_528358	1:200
Antibody	Anti-Laminin-2 (Rat monoclonal)	MilliporeSigma	L0663; RRID: AB_477153	1:500
Oligo DNA	TTAAACGAACGTACTTGCAGATG	Integrated DNA Technologies (IDT)	N/A	qPCR Vegfa 92bp (Forward)
Oligo DNA	AGAGGTCTGGTTCCCGAAA	Integrated DNA Technologies (IDT)	N/A	qPCR Vegfa 92bp (Reverse)
Oligo DNA	GCAGAGCCAGGAACATATACACA	Integrated DNA Technologies (IDT)	N/A	qPCR mFlt1 103 bp(Forward)
Oligo DNA	GAGATCCGAGAGAAAATGGCCTTT	Integrated DNA Technologies (IDT)	N/A	qPCR mFlt1 103bp (Reverse)
Oligo DNA	GCAGAGCCAGGAACATATACACA	Integrated DNA Technologies (IDT)	N/A	qPCR sFlt1 73bp (Forward)
Oligo DNA	CAGTGCTCACCTCTAACG	Integrated DNA Technologies (IDT)	N/A	qPCR sFlt1 73bp (Reverse)
Oligo DNA	CAGTGGTACTGGCAGCTAGAAG	Integrated DNA Technologies (IDT)	N/A	qPCR KDR/Flk1 66bp (Forward)
Oligo DNA	ACAAGCATACGGGCTTGTTT	Integrated DNA Technologies (IDT)	N/A	qPCR KDR/Flk1 66bp (Reverse)
Oligo DNA	TCCTGGGAAACTGGTATATCTATGA	Integrated DNA Technologies (IDT)	N/A	qPCR Nrp1 75bp (Forward)
Oligo DNA	CATTCCAGAGCAAGGATAATCTG	Integrated DNA Technologies (IDT)	N/A	qPCR Nrp1 75bp (Reverse)
Oligo DNA	ATGGCTGGACACCCAATTT	Integrated DNA Technologies (IDT)	N/A	qPCR Nrp2 67bp (Forward)
Oligo DNA	ATGGTTAGGAAGCGCAGGT	Integrated DNA Technologies (IDT)	N/A	qPCR Nrp2 67bp (Reverse)
Oligo DNA	CACCTGGAGAGGATGAAGAAGAA	Integrated DNA Technologies (IDT)	N/A	qPCR Myh3 298bp (Forward)
Oligo DNA	AAGACTTGACTTTCACTTGGAGTTTA TC	Integrated DNA Technologies (IDT)	N/A	qPCR Myh3 298bp (Reverse)
Oligo DNA	TTCGGAAGCTCCTTCTGTTT	Integrated DNA Technologies (IDT)	N/A	qPCR Htatsf1 79bp (Forward)
Oligo DNA	CCAGAGTCTGAATACAATGGTCA	Integrated DNA Technologies (IDT)	N/A	qPCR Htatsf1 79bp (Reverse)
Oligo DNA	CGCACGGCCGGTACAGTGAAACTG	Integrated DNA Technologies (IDT)	N/A	qPCR 18S rRNA 343bp (Forward)
Oligo DNA	CGCACGGCCGGTACAGTGAAACTG	Integrated DNA Technologies (IDT)	N/A	qPCR 18S rRNA 343bp (Reverse)
Oligo DNA	CTTGCTCACCATGGTCAGCTGCTG	Integrated DNA Technologies (IDT)	N/A	Genotyping Myh3 Exon1 WT/MUT-103bp (Reverse)
Oligo DNA	CACTTTTAACTTCGACCCTGAGCC	Integrated DNA Technologies (IDT)	N/A	Genotyping Myh3 Exon2 WT/MUT-103bp (Reverse)
Oligo DNA	GGCCAGACTCTCTTTCTCAAGTGC	Integrated DNA Technologies (IDT)	N/A	Genotyping Myh3 Exon2 WT-135bp (Forward)
Oligo DNA	GCAGAATTGCCTGTTATCCCTCCC	Integrated DNA Technologies (IDT)	N/A	Genotyping Myh3 Exon3 WT-135bp (Reverse)
Oligo DNA	GCTGCTGTTGATTACCTGGC	Integrated DNA Technologies (IDT)	N/A	Genotyping Pax7CreERT2 (Common)
Oligo DNA	CAAAAGACGGCAATATGGTG	Integrated DNA Technologies (IDT)	N/A	Genotying Pax7CreERT2 MUT-235bp (Reverse)
Oligo DNA	CTGCACTGAGACAGGACCG	Integrated DNA Technologies (IDT)	N/A	Genotying Pax7CreERT2 WT-419bp (Reverse)
Oligo DNA	GGCATTAAAGCAGCGTATCC	Integrated DNA Technologies (IDT)	N/A	Genotying R26RtdT (9103) MUT-196bp (Forward)
Oligo DNA	CTGTTCCTGTACGGCATGG	Integrated DNA Technologies (IDT)	N/A	Genotying R26RtdT (9105) MUT-196bp (Reverse)
Oligo DNA	AAGGGAGCTGCAGTGGAGTA	Integrated DNA Technologies (IDT)	N/A	Genotying R26RtdT (9020) WT-297bp (Forward)
Oligo DNA	CCGAAAATCTGTGGGAAGTC	Integrated DNA Technologies (IDT)	N/A	Genotying R26RtdT (9021) WT-297bp (Reserve)
Oligo DNA	AGCAGCACGACTTCTTCAAGTCCG	Integrated DNA Technologies (IDT)	N/A	Genotying Flk1GFP-161bp (Forward)
Oligo DNA	CTCCTTGAAGTCGATGCCCTTCAG	Integrated DNA Technologies (IDT)	N/A	Genotying Flk1GFP-161bp (Reserve)
Oligo DNA	CGCTTTTTGTCAGTCATCTTCA	Integrated DNA Technologies (IDT)	N/A	Genotying Flt1Loxp/Loxp (FlpeEX3F) WT-223bp/MUT-641bp (Forward)
Oligo DNA	GTGCCACTGACCTAACATGTAAGAG	Integrated DNA Technologies (IDT)	N/A	Genotying Flt1Loxp/Loxp (FlpeInt3R) WT-223bp/MUT-641bp (Reverse)
Oligo DNA	CCA TAG ATG TGA CAA GCC AAG	Integrated DNA Technologies (IDT)	N/A	Genotyping VEGFAHyper (24286) WT-254bp (Forward)
Oligo DNA	ACC CGG GGA TCC TCT AGA AC	Integrated DNA Technologies (IDT)	N/A	Genotyping VEGFAHyper (25307) MUT-199bp (Forward)
Oligo DNA	GAC CGT GCT TGG TCA CCT	Integrated DNA Technologies (IDT)	N/A	Genotyping VEGFAHyper (25308, Common) WT-254bp/MUT-199bp (Reverse)
Oligo DNA	CCTGGCCCTCAAGTACACCTT	Integrated DNA Technologies (IDT)	N/A	VEGFALoxP/LoxP (muVEGF 419.F) WT-106bp/MUT-148bp (Forward)
Oligo DNA	TCCGTACGACGCATTTCTAG	Integrated DNA Technologies (IDT)	N/A	VEGFALoxP/LoxP (muVEGF 567.R) WT-106bp/MUT-148bp (Reverse)
Oligo DNA	GAAGCTCCCAGAGACAAGTC	Integrated DNA Technologies (IDT)	N/A	mdx5cv (0981) WT/MUT-180bp (Forward)
Oligo DNA	TCATGAGCATGAAACTGTTCTT	Integrated DNA Technologies (IDT)	N/A	mdx5cv (0981) WT/MUT-180bp (Reverse)
Commercial assay or kit	GoTaq qPCR Master Mix	Promega,	A6002	qPCR
Commercial assay or kit	Click-iT EdU Alexa Fluor 488 Imaging Kit	Thermo Scientific	C10337	EdU staining
Commercial assay or kit	Crystal violet Assay Kit	Abcam	ab232855	Cell viability assay
Commercial assay or kit	Transcriptor First Strand cDNA Synthesis Kit	Roche-Sigma-Aldrich	4379012001	cDNA synthesis
Commercial assay or kit	Annexin V-Biotin Apoptosis Detection Kit	eBioscience	BMS500BT-100	Appotosis assay
Commercial assay or kit	DirectZolTM RNA Microprep Kit	Zymo Research	R2062	RNA isolation
Commercial assay or kit	Midi Fast Ion Plasmid Kit	IBI Scientific	IB47111	Plasmid DNA isolation
Commercial assay or kit	H&E Staining Kit	Abcam	ab245880	Histology
Commercial assay or kit	SuperSignal West Femto chemiluminescent substrate	Fisher Scientific	PI37074	Western Blotting
Commercial assay or kit	NE-PER Nuclear and Cytoplasmic Extraction reagents	Thermo Fisher Scientific	78833	Protein extraction
Chemical compound, drug	bFGF	Thermo Fisher Scientific	PHG0263	MuSC culture (20 ng/ml)
Chemical compound, drug	Bovine serum albumin (BSA)	Jackson ImmunoResearch	10001620	FACS/Immunostaining (1-2%)
Chemical compound, drug	Chicken embryo extract	MP-Biomedical	92850145	Single muscle fiber culture (0.5%)
Chemical compound, drug	Collagen	BD Biosciences	354236	Culture dish coating (0.01%)
Chemical compound, drug	Collagenase type I	Sigma-Aldrich	C0130	Single myofiber isolation (0.2%)
Chemical compound, drug	Collagenase type II	Worthington Biochemical Corp	CLD-2	FACS and MuSC/ES isolation (0.2%)
Chemical compound, drug	DAPI (4’,6-diamidino-2-phenylindole dihydrochloride)	Thermo Fisher Scientific	D1306	DNA staining (1 µg/ml)
Chemical compound, drug	Dulbecco’s Modified Eagle’s Medium (DMEM)	Thermo Fisher Scientific	41966	Single myofiber and ES culture
Chemical compound, drug	EdU	Thermo Fisher Scientific	C10340	Cell proliferation (1 μM)
Chemical compound, drug	F-10 Ham's media	Sigma-Aldrich	N6635	MuSC culture
Chemical compound, drug	Fetal calf serum (FCS)	Atlas Biological	FS-0500-AD	MuSC/EC/Single muscle fiber culture (10% or 20%)
Chemical compound, drug	Horse serum	Thermo Fisher Scientific	26050088	2% (coating), 5% (Differentiation culture)
Chemical compound, drug	L-glutamine	Thermo Fisher Scientific	25030	Culture medium (20 mM)
Chemical compound, drug	Matrigel	Corning Life Sciences	354230	Single muscle fiber culture (1:20)
Chemical compound, drug	Penicillin/streptomycin	Life Technologies	15140	Culture medium (1X)
Chemical compound, drug	Tamoxifen (TMX)	Sigma-Aldrich	T5648	Cre recombinase (60 mg/kg i.p.)
Chemical compound, drug	4-hydroxy tamoxifen (4-OHT)	Sigma-Aldrich	H6278	Culture (1 µM)
Chemical compound, drug	Cardiotoxin (CTX)	Sigma-Aldrich	V9125	Muscle injury (10 µM)
Chemical compound, drug	DraIII	New England Biolabs	R3510S	DNA digestion (500 U/ml)
Chemical compound, drug	ZombieNIR	Biolegends	423105	FACS (0.1%)
Chemical compound, drug	recombinant VEGFA	R&D Systems	493-MV	Culture (2-100 ng/ml)
Chemical compound, drug	Thapsigargin	Sigma-Aldrich	T9033	Culture (1 µM)
Chemical compound, drug	FLT1-FC	R&D Systems	7756-FL	Culture (100 ng/ml)
Chemical compound, drug	ZM306416	R&D Systems	2499/1	Culture (3 µM)
Chemical compound, drug	SU5402	R&D Systems	3300/1	Culture (10 µM)
Chemical compound, drug	EG00229	R&D Systems	6986/10	Culture (30 µM)
Chemical compound, drug	PolyJet transfection reagent	Signagen Laboratories	SL100688	DNA transfection (10 µl for 6 cm plate)
Chemical compound, drug	Polybrene	MilliporeSigma	H9268	Viral infection (0.8 μg/ml)
Chemical compound, drug	Saponin	ThermoFisher Scientific	ICN10285525	Immunostaining (0.01%)
Chemical compound, drug	Direct Red 80	Sigma-Aldrich	365548	Histology (0.1%)
Chemical compound, drug	Proteinase K	Sigma-Aldrich	P2308	DNA isolation (40 µg/mL)
Chemical compound, drug	Oil Red O solution	Sigma-Aldrich	O1391-250ML	Histology (0.5%)
Chemical compound, drug	Trizol	ThermoFisher Scientific	15596026	RNA isolation
Software, algorithm	Photoshop 2020	Adobe	https://www.adobe.com/products/photoshop.html	Imaging analysis
Software, algorithm	Fiji	NIH	https://imagej.net/software/fiji/	Imaging analysis
Software, algorithm	cellSens Entry 1.11	Olympus	https://www.olympus-lifescience.com/en/software/cellsens/	Microscopy
Software, algorithm	Prism 9	GraphPad	https://www.graphpad.com/support/faq/prism-900-release-notes/	Data analysis and statistics
Software, algorithm	RStudio	RStudio	https://www.rstudio.com	Data analysis and statistics
Software, algorithm	Autodesk Graphic	Autodesk	https://www.graphic.com	Vector design
Software, algorithm	BioRender: Scientific Image and Illustration Software	BioRender.com	https://www.biorender.com	Illustrator
Other	Anti-biotin beads	Miltenyi Biotec	130-090-485; RRID:AB_244365	MACS
Other	Anti-PE beads	Miltenyi Biotec	130-048-801; RRID:AB_244373	MACS
Other	Cell culture plate, 24 well	Sarstedt	83.3922	Single myofiber culture
Other	Tissue culture dish	Sarstedt	83.39	MuSC/ES culture
Other	Tissue culture dish	Sarstedt	83.3901	MuSC/ES culture
Other	Tissue culture dish	Sarstedt	83.3902	MuSC/ES culture
Other	LD column	Miltenyi Biotec	130-042-901	MACS
Other	MS column	Miltenyi Biotec	130-042-201	MACS
Other	Fortessa X-20	BD Biosciences		FACS
Other	BD FACSAria	BD Biosciences		FACS
Other	moorLabTM laser Doppler	Moor Instruments	MOORVMS-LDF	Laser Doppler flow
Other	Grip strength meter	Columbus Instruments	1027CSM-D54	Forelimb muscle force
Other	iBright FL1500	ThermoFisher Scientific	A44115	Western blotting
Other	Olympus IX81 Inverted Fluorescense microscope	Olympus		Microscope
Other	Olympus BX51 Fluorescense microscope	Olympus		Microscope
