# Supplementary figures and images for: Endothelial cell signature in muscle stem cells validated by VEGFA-FLT1-AKT1 axis promoting survival of muscle stem cell
Source: eLife journal article supplement (doi:10.7554/elife.73592), 2024-06-06

# Figure 2-figure supplement 1

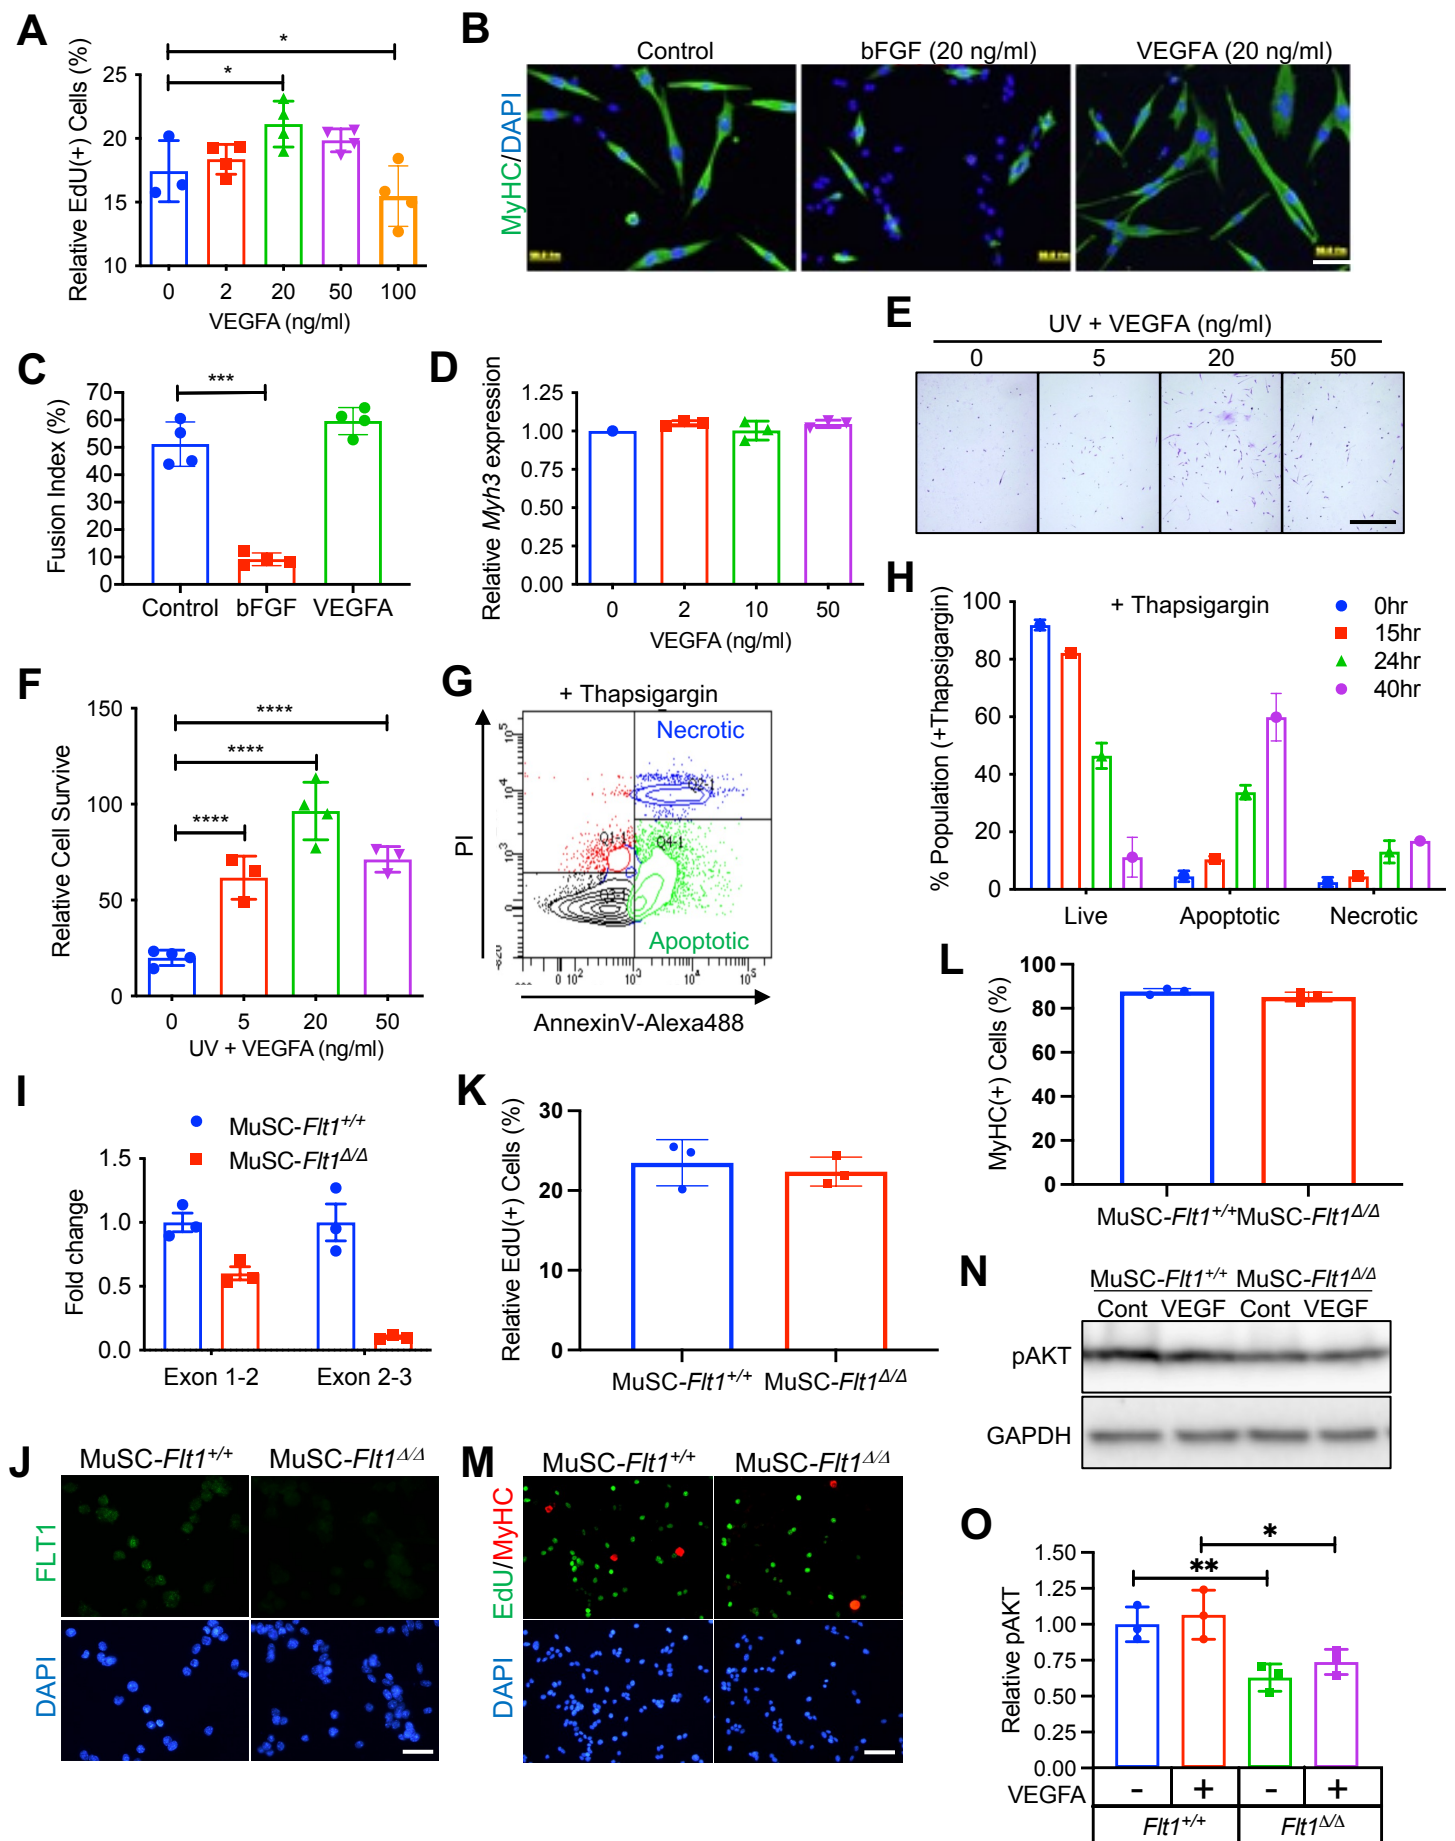

Supplement: supp [file elife-73592-supp-v1.zip]

Figure 3-figure supplement 2

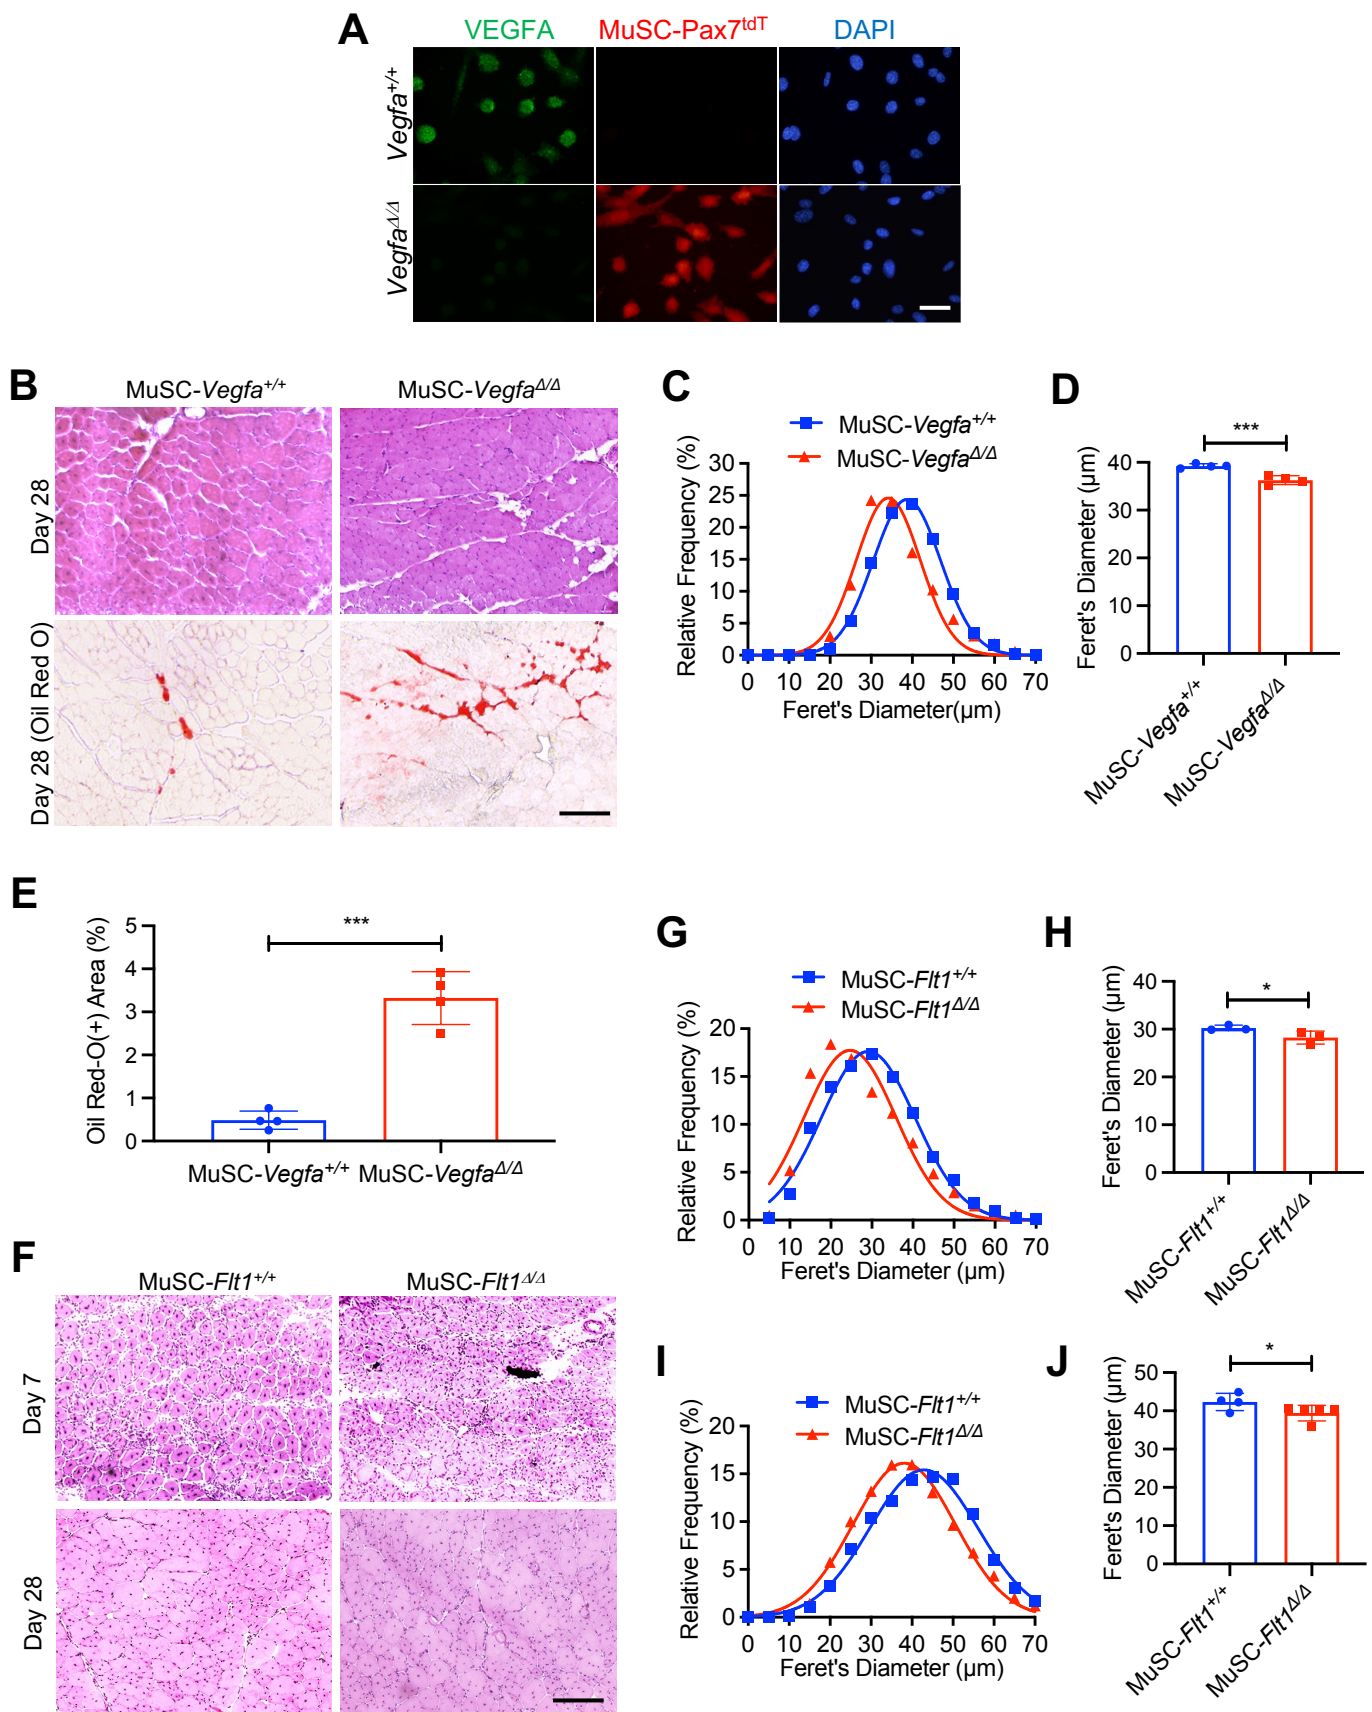

Supplement: supp [file elife-73592-supp-v1.zip]

Figure 3-figure supplement 1

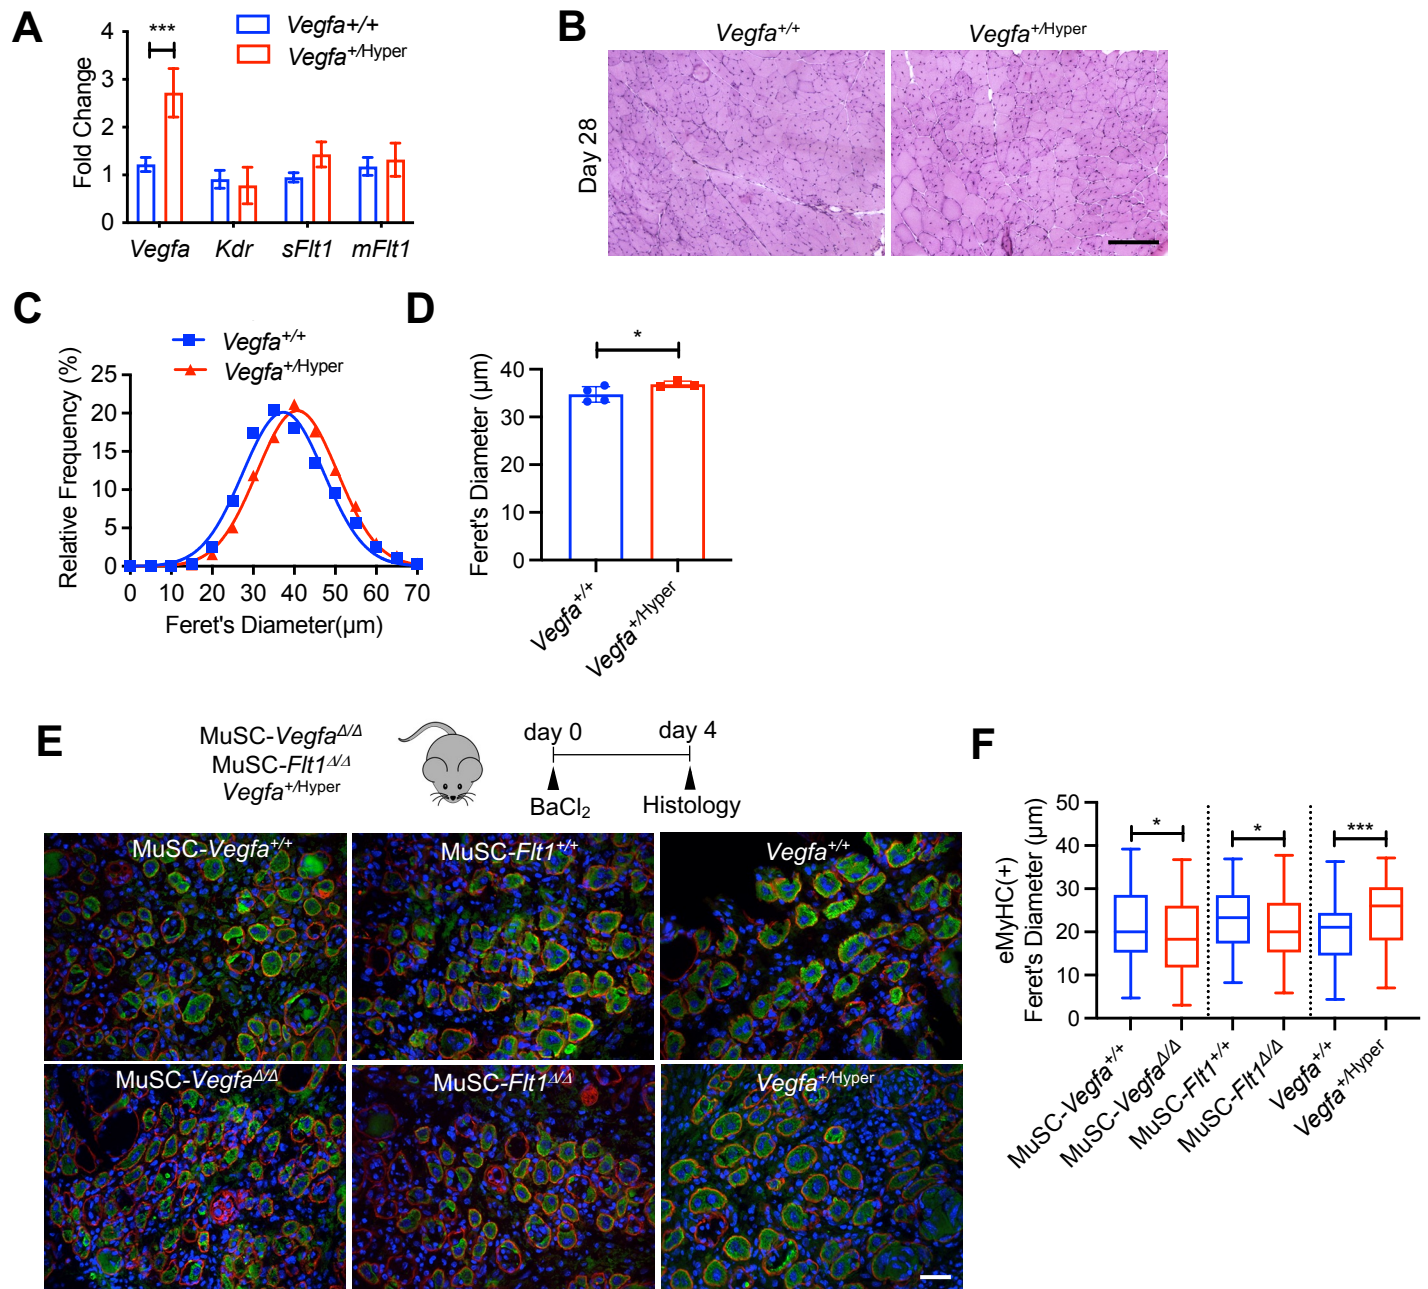

Supplement: supp [file elife-73592-supp-v1.zip]

# Figure 4-figure supplement 1

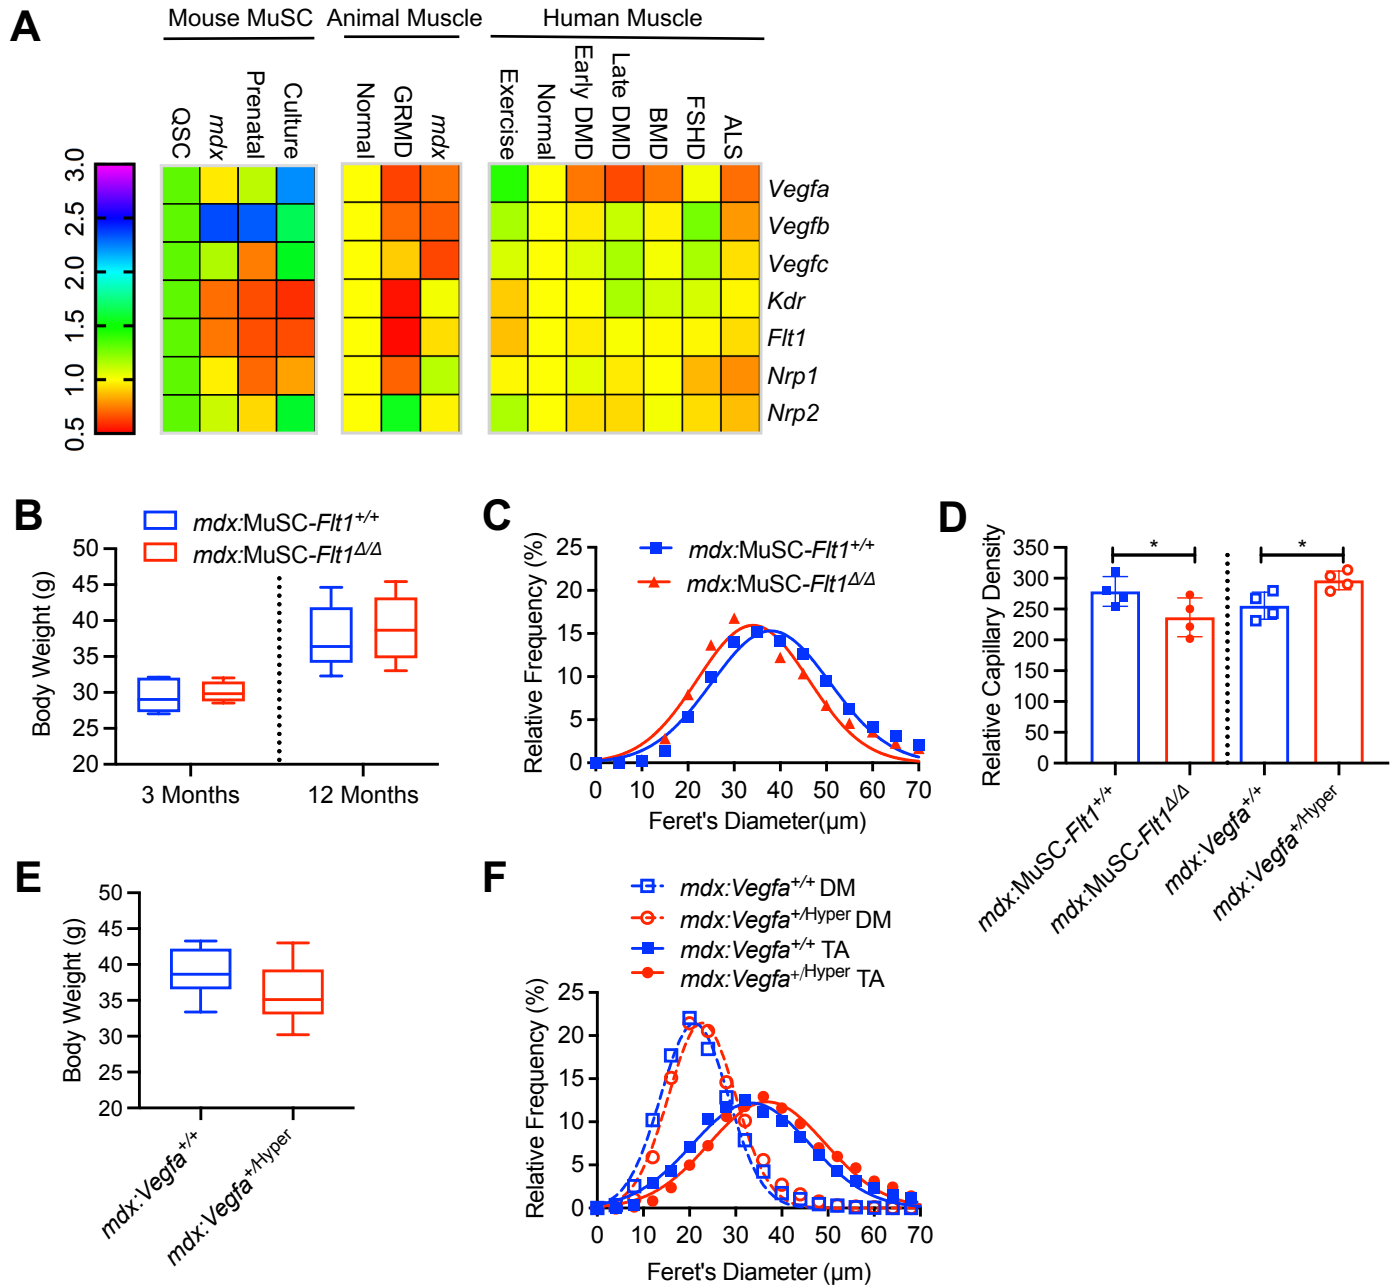

Supplement: supp [file elife-73592-supp-v1.zip]

# Figure 4-figure supplement 2

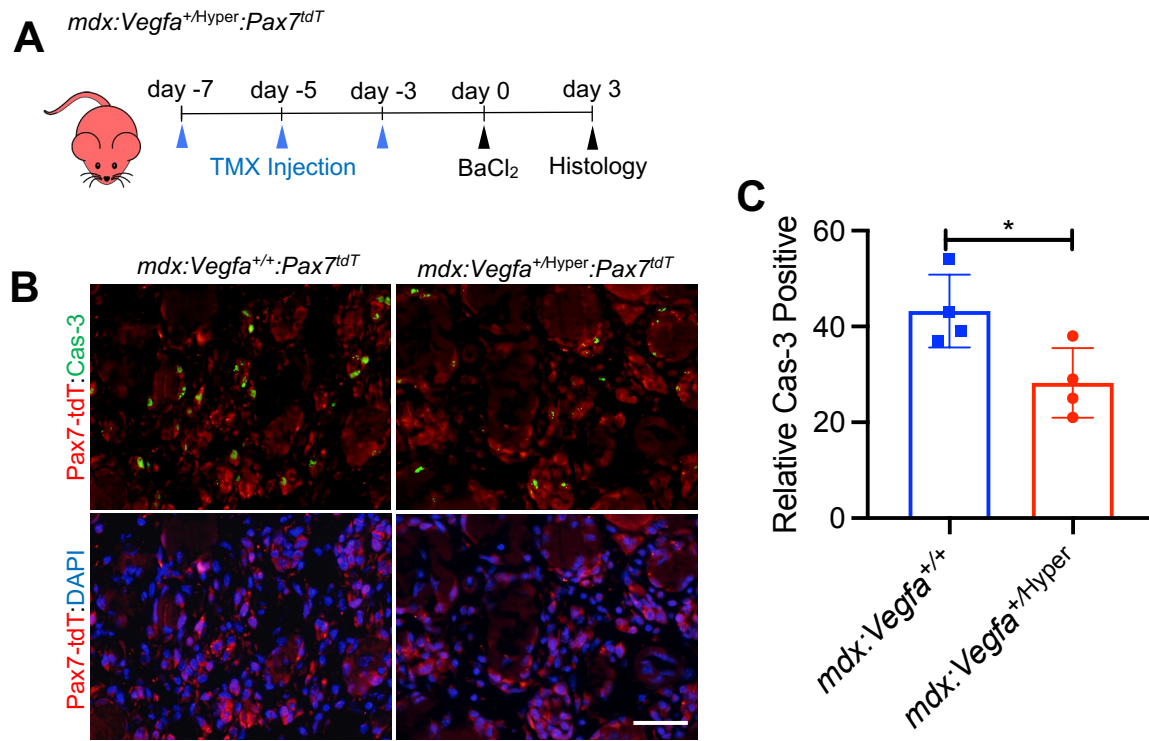

Supplement: supp [file elife-73592-supp-v1.zip]

# Figure 1-figure supplement 1

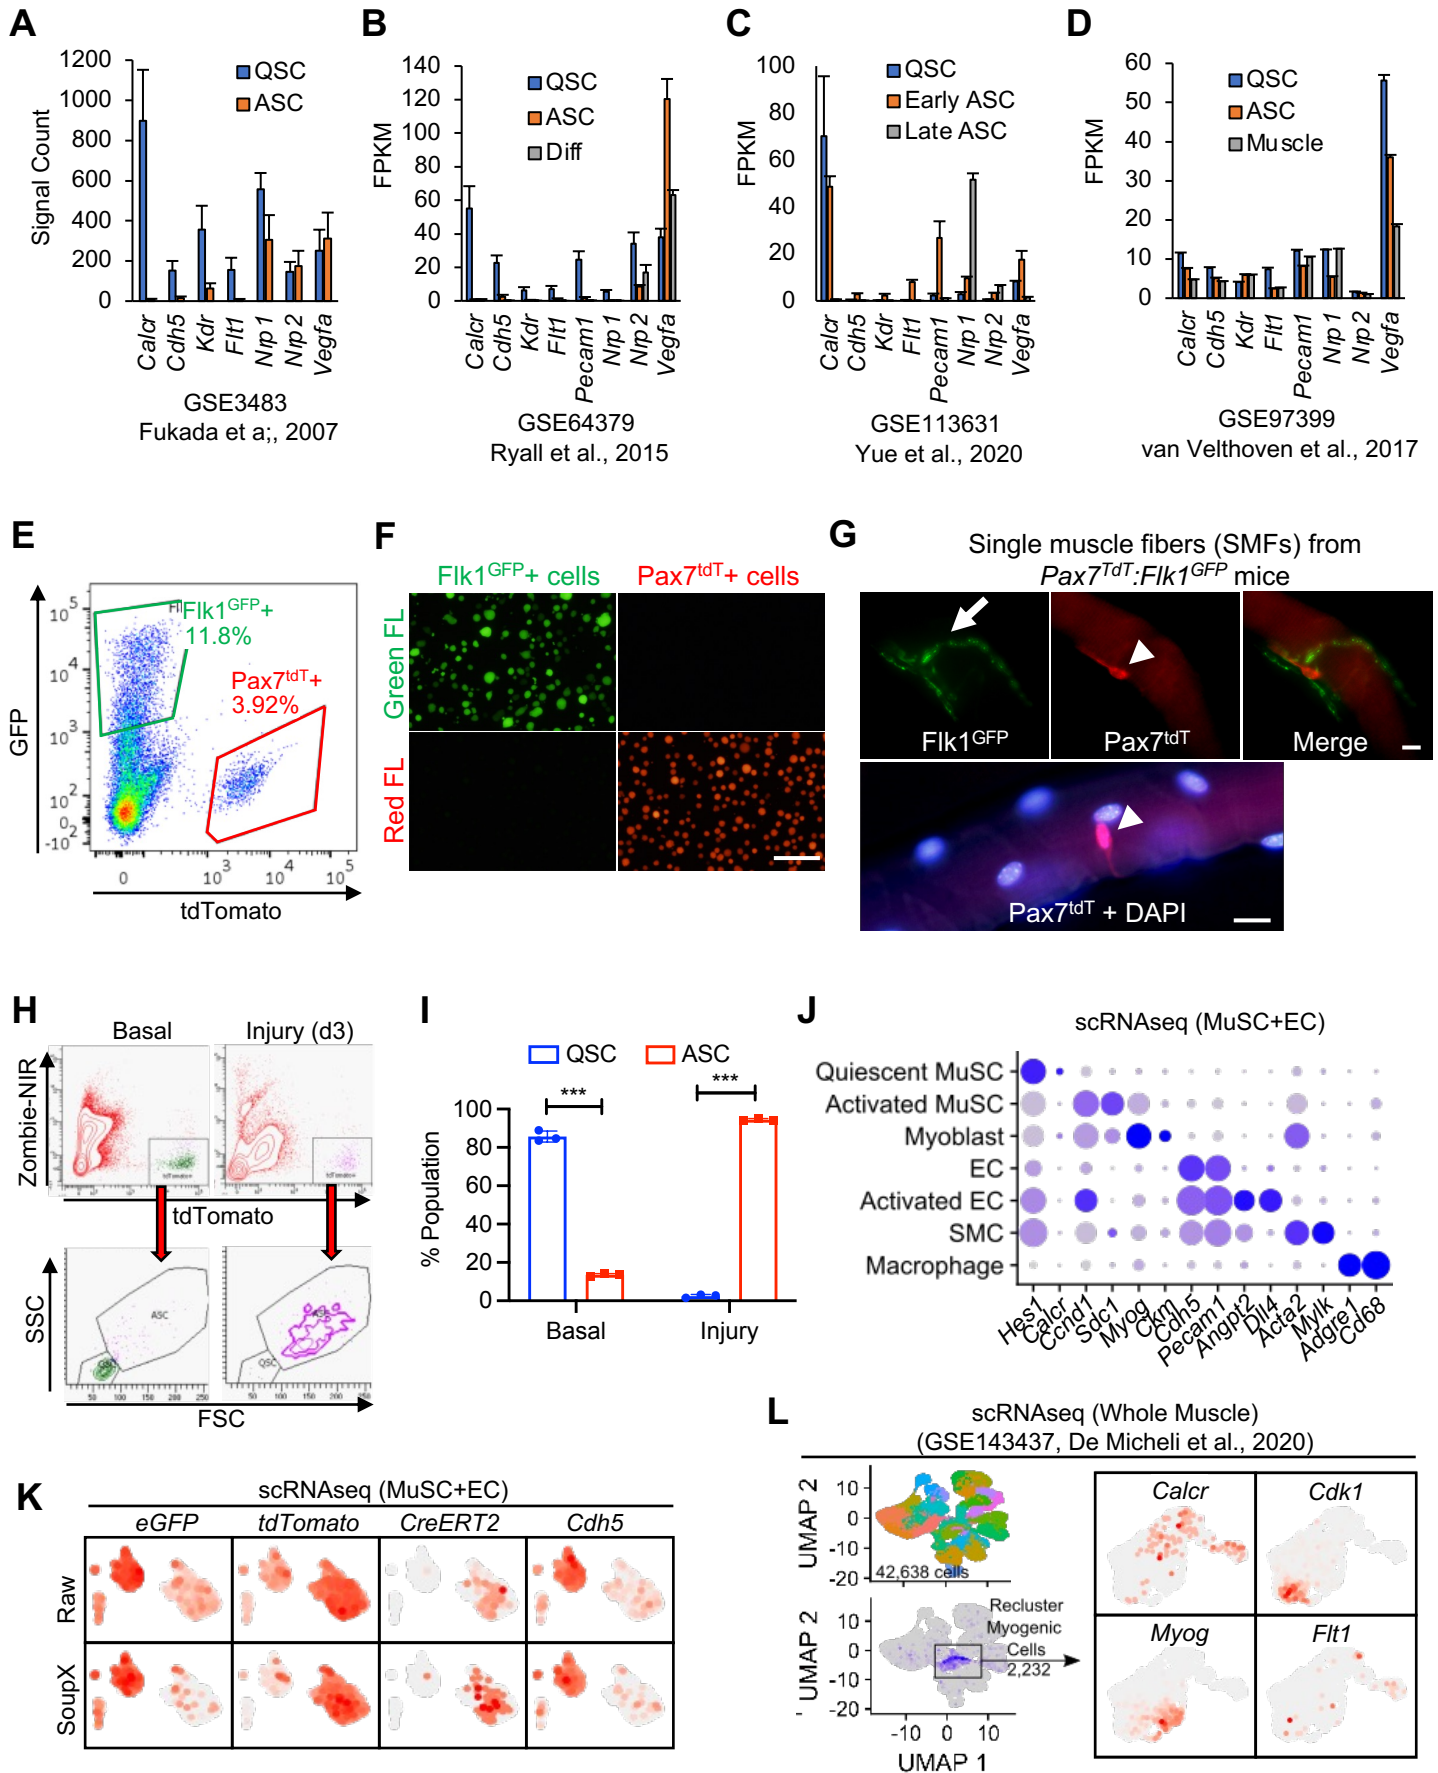

Supplement: supp [file elife-73592-supp-v1.zip]
